# Supplementary material
Source: PubMed Central journal article supplement (PMC1988920)
Supplement: blood_blood-2007-01-066209_2.pdf [file blood_blood-2007-01-066209_2.pdf]

| #   | GENOTYPE                                                   | TIME. months | MUTATION IN Notch1                           | CONSEQUENCE OF MUTATION |
|-----|------------------------------------------------------------|--------------|----------------------------------------------|-------------------------|
| 55  | p16 <sup>+</sup> TAL1 <sup>+/-</sup> LMO1 <sup>+/-</sup>   | 10.9         | substitution G 6355,T 6888,T 7273 and G 7271 | mutated protein         |
| 57  | p16 <sup>+</sup> TAL1 <sup>+/-</sup> LMO1 <sup>+/-</sup>   | 13.8         | 7704-6573: no mutation                       |                         |
| 67  | p16 <sup>+</sup> TAL1 <sup>+/-</sup> LMO1 <sup>+/-</sup>   | 5.5          | insertion A 7160. mutation 7128              | mutated protein         |
| 75  | p16 <sup>+</sup> TAL1 <sup>+/-</sup> LMO1 <sup>+/-</sup>   | 6.2          | 7272-6861: no mutation                       |                         |
| 76  | p16 <sup>+</sup> TAL1 <sup>+/-</sup> LMO1 <sup>+/-</sup>   | 8.3          | 7704-7105. 6228-6888: no mutation            |                         |
| 229 | p16 <sup>+</sup> TAL1 <sup>+/-</sup> LMO1 <sup>+/-</sup>   | 4.5          | deletion 6843                                | premature stop 6975     |
| 239 | p16 <sup>+</sup> TAL1 <sup>+/-</sup> LMO1 <sup>+/-</sup>   | 7.7          | one mutation 6783                            | mutation P 6783         |
| 4   | pTα <sup>-/-</sup> LMO1 <sup>+/-</sup>                     | 7.8          | mutations exon 34                            | premature stop 7256     |
| 15  | pTα <sup>-/-</sup> LMO1 <sup>+/-</sup>                     | 8.8          | deletion + insertion 7154 to 7491            | mutated protein         |
| 21  | pTα <sup>-/-</sup> LMO1 <sup>+/-</sup>                     | 8.8          | exon 34 mutated                              | mutated protein         |
| 32  | pTα <sup>-/-</sup> LMO1 <sup>+/-</sup>                     | 7.3          | 6690-7051: no mutations                      |                         |
| 6   | pTα <sup>-/-</sup> TAL1 <sup>+/-</sup> LMO1 <sup>+/-</sup> | 7.8          | 6646-7052: no mutations                      |                         |
| 16  | pTα <sup>-/-</sup> TAL1 <sup>+/-</sup> LMO1 <sup>+/-</sup> | 8.8          | mutations A 6877 and A 6887 (thymus and LN)  | premature stop 6888     |
| 22  | pTα <sup>-/-</sup> TAL1 <sup>+/-</sup> LMO1 <sup>+/-</sup> | 8.2          | insertion 7093 to 7156                       | mutated protein         |
| 36  | pTα <sup>-/-</sup> TAL1 <sup>+/-</sup> LMO1 <sup>+/-</sup> | 6.7          | deletion insertion in exon 34                | premature stop 6975     |
| 43  | pTα <sup>-/-</sup> TAL1 <sup>+/-</sup> LMO1 <sup>+/-</sup> | 6.7          | 7620-7273. 6647-7052: no mutation            |                         |
| 177 | pTα <sup>-/-</sup> TAL1 <sup>+/-</sup> LMO1 <sup>+/-</sup> | 5.7          | insertion 18 nt at 6996                      | mutated protein         |
| 176 | pTα <sup>-/-</sup> TAL1 <sup>+/-</sup> LMO1 <sup>+/-</sup> | 6.4          | 7628-7131. 7051-6698: no mutation            |                         |
| 155 | pTα <sup>-/-</sup> TAL1 <sup>+/-</sup> LMO1 <sup>+/-</sup> | 5.4          | insertion 15 nt at 7050                      | premature stop 7158     |
| 183 | pTα <sup>-/-</sup> TAL1 <sup>+/-</sup> LMO1 <sup>+/-</sup> | 6.7          | 7052-6695: no mutation (thymus and LN)       |                         |
| 193 | pTα <sup>-/-</sup> TAL1 <sup>+/-</sup> LMO1 <sup>+/-</sup> | 6.3          | 7052-6696: no mutation                       |                         |
| 213 | pTα <sup>-/-</sup> TAL1 <sup>+/-</sup> LMO1 <sup>+/-</sup> | 7.6          | deletion insertion in exon 34                | premature stop 6708     |

\*Numbers correspond to nucleotide position in cDNA
